# Supplementary material for: A fully automatic target detection and quantification strategy based on object detection convolutional neural network YOLOv3 for one-step X-ray image grading
Source: Royal Society of Chemistry journal article supplement (doi:10.1039/d2ay01526a), 2022-11-08
Supplement: d2ay01526a1.pdf [file d2ay01526a1.pdf]

## Supporting information

# Fully Automatic Target Detection and Quantification Strategy Based on Object Detection Convolutional Neural Network YOLOv3 for One-step X-Ray Image Grading

Nan Chen <sup>a,‡</sup>, Zhi-Chao Feng <sup>b,‡</sup>, Fei Li <sup>c</sup>, Hai-Bo Wang <sup>a</sup>, Ru-Qin Yu <sup>a</sup>, Jian-Hui Jiang <sup>a,\*</sup>, Li-Juan  
Tang <sup>a,\*</sup>, Peng-Fei Rong <sup>b,\*</sup>, Wei Wang <sup>b</sup>

<sup>a</sup> *State Key Laboratory of Chemo/Biosensing and Chemometrics, College of Chemistry and  
Chemical Engineering, Hunan University, Changsha 410082, China*

<sup>b</sup> *Department of Radiology, The Third Xiangya Hospital, Central South University, Changsha  
410013, China*

<sup>c</sup> *College of Electrical and Information Engineering, Hunan University, Changsha 410082,  
China*

\* Corresponding Author. *E-mail* addresses: jianhuijiang@hnu.edu.cn (J.H. Jiang),  
tanglijuan@hnu.edu.cn (L.J. Tang), rongpengfei66@163.com (P.F. Rong)

## Table of contents

### Supplementary Table and Figures

|                 |   |
|-----------------|---|
| Table S1-----   | 3 |
| Table S2-----   | 4 |
| Figure S1 ----- | 5 |
| Figure S2 ----- | 6 |
| Figure S3 ----- | 7 |

**Table S1.** The characteristics of knee OA at different KL grades.

| KL grade | Severity | Description                                                                         |
|----------|----------|-------------------------------------------------------------------------------------|
| Grade 0  | Normal   | No changes                                                                          |
| Grade 1  | Doubtful | Doubtful JSN, Possible osteophytic lipping                                          |
| Grade 2  | Minimal  | Definite osteophyte, Possible JSN                                                   |
| Grade 3  | Moderate | Moderate osteophytes, Some sclerosis, Definite JSN, Possible deformity of bone ends |
| Grade 4  | Severe   | Large osteophytes, Severe sclerosis, Marked JSN, Deformity of bone ends             |

**Table S2.** Comparison between reported deep learning methods for knee OA detection.

| Method                                             | Strategy | Dataset                                          | Multiclass accuracy (%) | Reference     |
|----------------------------------------------------|----------|--------------------------------------------------|-------------------------|---------------|
| End-to-end CNN integrating local feature detectors | One-step | OAI and MOST public dataset                      | 64.3                    | 33            |
| Integration of FCN and CNN                         | One-step | OAI and MOST public dataset                      | 64.6                    | 34            |
| SVM followed by siamese CNN                        | Two-step | OAI and MOST public dataset                      | 66.71                   | 32            |
| FCN followed by CNN                                | Two-step | OAI and MOST public dataset                      | 61.9                    | 22            |
| SVM followed by deep CNN                           | Two-step | OAI public dataset                               | 59.6                    | 18            |
| OsteoHRNet                                         | Two-step | OAI public dataset                               | 71.74                   | 37            |
| YOLOv2 followed by VGG-19-Ordinal CNN              | Two-step | OAI public dataset                               | 70.4                    | 28            |
| Integrated CNN based on YOLOv3                     | One-step | OAI public dataset and clinically collected data | 74.91                   | Current study |

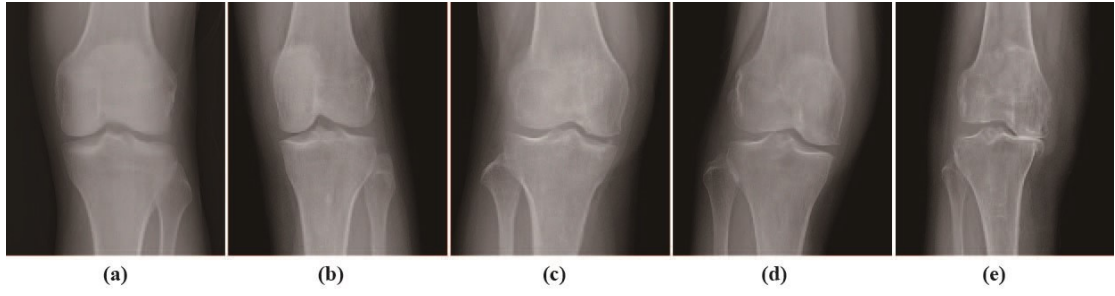

**Figure S1.** Typical images at different KL grades from the Third Xiangya Hospital:

(a) Grade 0, (b) Grade 1, (c) Grade 2, (d) Grade 3, and (e) Grade 4.

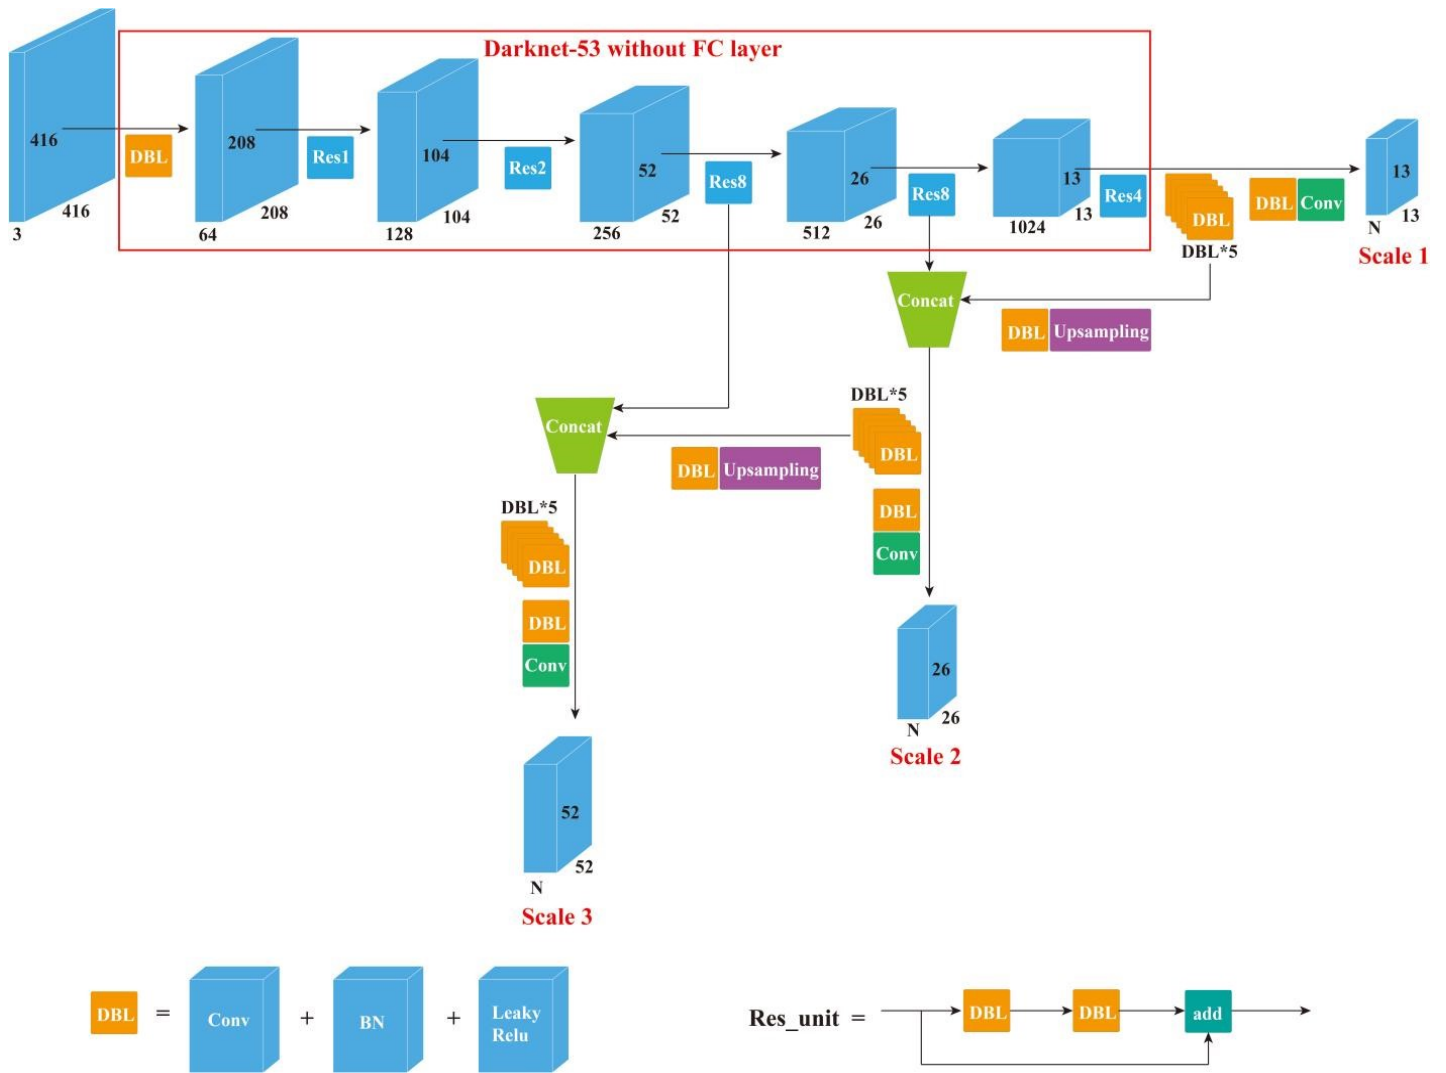

**Figure S2.** Scheme of the network structure of YOLOv3. The DBL in the figure is the smallest component of YOLOv3 and consists of the convolutional layer, Batch Normalization layer and Leaky Relu activation function. There are 5 Resn (n=1, 2, 4, 8) structures in the network. Each block for residual calculation (Res\_block) contains  $n$  Res\_units. The Concat in the figure stands for tensor concatenation that concatenates the middle layer of the Darknet-53 with the upsampling of a later layer. The add in the Res\_unit structure represents the addition of tensors that doesn't extend dimensions.

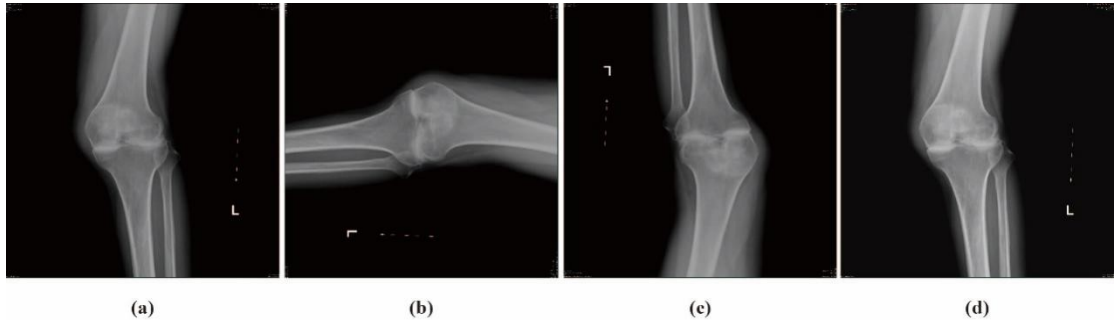

**Figure S3.** Image augmentation methods: (a) original image, (b) 90° clockwise rotation, (c) 180° clockwise rotation, and (d) brightness transformation.
